# Supplementary material for: Pharmacokinetic Interactions between Tafenoquine and Dihydroartemisinin-Piperaquine or Artemether-Lumefantrine in Healthy Adult Subjects
Source: PubMed Central journal article supplement (PMC5119013; doi:10.1128/aac.01588-16), 2016-11-21
Supplement: AAC.01588-16_zac012165760so1.pdf [file AAC.01588-16_zac012165760so1.pdf]

Table A1: Pharmacokinetic sampling times and assays by cohort

| Sampling Times |          | Cohort 1<br>(TQ + DHA-PQP) |        | Cohort 2<br>(TQ + AL) |        | Cohort 3<br>(DHA-PQP) |        | Cohort 4<br>(AL)    |        | Cohort 5<br>(TQ)    |        |
|----------------|----------|----------------------------|--------|-----------------------|--------|-----------------------|--------|---------------------|--------|---------------------|--------|
| Day            | Hour     | # 2mL blood samples        | Assays | # 2mL blood samples   | Assays | # 2mL blood samples   | Assays | # 2mL blood samples | Assays | # 2mL blood samples | Assays |
| 1              | Pre-dose | 2                          | A, B   | 2                     | A, C   | 1                     | B      | 1                   | C      | 1                   | A      |
|                | 1        | 1                          | B      | 1                     | C      | 1                     | B      | 1                   | C      |                     |        |
|                | 2        | 2                          | A, B   | 2                     | A, C   | 1                     | B      | 1                   | C      | 1                   | A      |
|                | 4        | 1                          | B      | 1                     | C      | 1                     | B      | 1                   | C      |                     |        |
|                | 6        | 2                          | A, B   | 2                     | A, C   | 1                     | B      | 1                   | C      | 1                   | A      |
|                | 12       | 1                          | A      | 1                     | A      |                       |        |                     |        | 1                   | A      |
| 2              | 24       | 1                          | A      | 1                     | A      |                       |        |                     |        | 1                   | A      |
| 3              | 48       | 2                          | A, B   | 1                     | A      | 1                     | B      |                     |        | 1                   | A      |
|                | 48.5     | 1                          | B      |                       |        | 1                     | B      |                     |        |                     |        |

| Sampling Times |      | Cohort 1<br>(TQ + DHA-PQP) |        | Cohort 2<br>(TQ + AL) |        | Cohort 3<br>(DHA-PQP) |        | Cohort 4<br>(AL)    |        | Cohort 5<br>(TQ)    |        |
|----------------|------|----------------------------|--------|-----------------------|--------|-----------------------|--------|---------------------|--------|---------------------|--------|
| Day            | Hour | # 2mL blood samples        | Assays | # 2mL blood samples   | Assays | # 2mL blood samples   | Assays | # 2mL blood samples | Assays | # 2mL blood samples | Assays |
|                | 49   | 1                          | B      |                       |        | 1                     | B      |                     |        |                     |        |
|                | 49.5 | 1                          | B      |                       |        | 1                     | B      |                     |        |                     |        |
|                | 50   | 1                          | B      |                       |        | 1                     | B      |                     |        |                     |        |
|                | 51   | 1                          | B      |                       |        | 1                     | B      |                     |        |                     |        |
|                | 52   | 1                          | B      |                       |        | 1                     | B      |                     |        |                     |        |
|                | 54   | 1                          | B      |                       |        | 1                     | B      |                     |        |                     |        |
|                | 56   | 1                          | B      |                       |        | 1                     | B      |                     |        |                     |        |
|                | 60   | 2                          | A, B   | 2                     | A, C   | 1                     | B      | 1                   | C      | 1                   | A      |
|                | 60.5 |                            |        | 1                     | C      |                       |        | 1                   | C      |                     |        |
|                | 61   |                            |        | 1                     | C      |                       |        | 1                   | C      |                     |        |
|                | 61.5 |                            |        | 1                     | C      |                       |        | 1                   | C      |                     |        |

| Sampling Times     |      | Cohort 1<br>(TQ + DHA-PQP) |        | Cohort 2<br>(TQ + AL) |        | Cohort 3<br>(DHA-PQP) |        | Cohort 4<br>(AL)    |        | Cohort 5<br>(TQ)    |        |
|--------------------|------|----------------------------|--------|-----------------------|--------|-----------------------|--------|---------------------|--------|---------------------|--------|
| Day                | Hour | # 2mL blood samples        | Assays | # 2mL blood samples   | Assays | # 2mL blood samples   | Assays | # 2mL blood samples | Assays | # 2mL blood samples | Assays |
|                    | 62   |                            |        | 1                     | C      |                       |        | 1                   | C      |                     |        |
|                    | 64   |                            |        | 1                     | C      |                       |        | 1                   | C      |                     |        |
| 4                  | 66   |                            |        | 1                     | C      |                       |        | 1                   | C      |                     |        |
|                    | 68   |                            |        | 1                     | C      |                       |        | 1                   | C      |                     |        |
|                    | 72   | 2                          | A, B   | 2                     | A, C   | 1                     | B      | 1                   | C      | 1                   | A      |
| 7                  | -    | 2                          | A, B   | 2                     | A, C   | 1                     | B      | 1                   | C      | 1                   | A      |
| 14                 | -    | 2                          | A, B   | 2                     | A, C   | 1                     | B      | 1                   | C      | 1                   | A      |
| 21                 | -    | 2                          | A, B   | 2                     | A, C   | 1                     | B      | 1                   | C      | 1                   | A      |
| 28                 | -    | 2                          | A, B   | 2                     | A, C   | 1                     | B      | 1                   | C      | 1                   | A      |
| 56                 | -    | 2                          | A, B   | 1                     | A      | 1                     | B      | -                   | -      | 1                   | A      |
| $\Sigma$ # samples |      | 34                         |        | 31                    |        | 21                    |        | 18                  |        | 13                  |        |

| Sampling Times   |      | Cohort 1<br>(TQ + DHA-PQP) |        | Cohort 2<br>(TQ + AL) |        | Cohort 3<br>(DHA-PQP) |        | Cohort 4<br>(AL)    |        | Cohort 5<br>(TQ)    |        |
|------------------|------|----------------------------|--------|-----------------------|--------|-----------------------|--------|---------------------|--------|---------------------|--------|
| Day              | Hour | # 2mL blood samples        | Assays | # 2mL blood samples   | Assays | # 2mL blood samples   | Assays | # 2mL blood samples | Assays | # 2mL blood samples | Assays |
| <b>Σ # draws</b> |      | 23                         |        | 22                    |        | 21                    |        | 18                  |        | 13                  |        |

Plasma assays:

A = tafenoquine (TQ)

B = piperazine (PQP), dihydroartemisinin (DHA)

C = artemether (A), dihydroartemisinin (DHA), lumefantrine (L).

T

Table A2: Change from baseline QTcF treatment difference for the interaction of tafenoquine with dihydroartemisinin-piperaquine

| Time point | Difference for (tafenoquine + dihydroartemisinin-piperaquine) – dihydroartemisinin-piperaquine (90% CI) |
|------------|---------------------------------------------------------------------------------------------------------|
| 12 h       | 5.63 (0.76, 10.51)                                                                                      |
| 24 h       | 4.55 (0.22, 8.89)                                                                                       |
| 36 h       | 3.22 (-2.21, 8.64)                                                                                      |
| 48 h       | 5.63 (0.38, 10.89)                                                                                      |
| 52 h       | 3.80 (-3.59, 11.20)                                                                                     |
| 60 h       | 4.06 (-1.95, 10.07)                                                                                     |
| 72 h       | 4.01 (-1.18, 9.20)                                                                                      |
| Day 7      | 3.38 (-1.45, 8.22)                                                                                      |
| Day 14     | 2.30 (-3.84, 8.44)                                                                                      |
| Day 28     | -1.14 (-6.40, 4.13)                                                                                     |
| Day 56     | 1.15 (-2.99, 5.29)                                                                                      |
